# Supplementary material for: Protecting the poor? Impact of the national health equity fund on utilization of government health services in Cambodia, 2006-2013
Source: PubMed Central journal article supplement — BMJ Glob Health. 2019 Nov 13;4(6):e001679. doi: 10.1136/bmjgh-2019-001679 (PMC6861123; doi:10.1136/bmjgh-2019-001679), 2019-11-13
Supplement: bmjgh-2019-001679supp001.pdf [file bmjgh-2019-001679supp001.pdf]

**Appendix Table A: Sensitivity analysis**  
**Effects of HEF on monthly utilization of referral hospitals (excluding Phnom Penh, Battambang, Banteay Meanchey) 2006-2013**

| Variables                                       | No of Outpatient Consultation | No of Inpatient Cases       | No of New-born Deliveries   |
|-------------------------------------------------|-------------------------------|-----------------------------|-----------------------------|
| <b>HEF effect:</b>                              |                               |                             |                             |
| Underlying time trend (slope)                   | <b>23.0 (11.8, 34.2)</b>      | <b>6.2 (3.9, 8.5)</b>       | -3.4 (-10.1, 3.3)           |
| Level change at point of HEF introduction       | 43.7 (-12.3, 99.6)            | <b>41.9 (30.8, 53.2)</b>    | 6.8 (-22/8, 36.4)           |
| Slope change at the point of HEF introduction   | <b>40.1 (27.8, 52.4)</b>      | <b>27.8 (25.3, 30.3)</b>    | <b>10.8 (4.1, 17.5)</b>     |
| <b>Seasonal effect:</b>                         |                               |                             |                             |
| January                                         | REF                           | REF                         | REF                         |
| February                                        | -11.8 (-68.5, 44.9)           | <b>-15.5 (-27.1, -3.8)</b>  | <b>-10.6 (-14.8, -6.4)</b>  |
| March                                           | -5.4 (-61.9, 51.1)            | <b>-16.1 (-27.8, -4.5)</b>  | <b>-10.9 (-15.0, -6.7)</b>  |
| April                                           | -32.8 (-89.4, 23.7)           | <b>-15.1 (-26.7, -3.4)</b>  | <b>-8.6 (-12.7, -4.4)</b>   |
| May                                             | -12.6 (-68.8, 43.6)           | -6.3 (-18.0, 5.3)           | <b>-12.7 (-16.8, -8.5)</b>  |
| June                                            | 40.7 (-15.8, 97.3)            | <b>22.1 (10.4, 33.8)</b>    | <b>-15.3 (-19.4, -11.1)</b> |
| July                                            | <b>73.4 (16.8, 130.1)</b>     | <b>46.3 (34.5, 57.9)</b>    | <b>-15.8 (-20.0, -11.6)</b> |
| August                                          | <b>92.6 (36.2, 149.0)</b>     | <b>36.9 (25.3, 48.7)</b>    | <b>-14.5 (-18.7, -10.3)</b> |
| September                                       | 39.0 (-17.2, 95.3)            | <b>23.1 (11.4, 34.8)</b>    | <b>-7.8 (-11.9, -3.6)</b>   |
| October                                         | 47.0 (-9.3, 103.3)            | <b>33.4 (21.8, 45.1)</b>    | -3.0 (-7.1, 1.2)            |
| November                                        | 34.6 (-21.8, 90.9)            | <b>22.3 (10.7, 33.9)</b>    | -1.7 (-5.9, 2.4)            |
| December                                        | <b>56.8 (0.46, 113.1)</b>     | -6.8 (-18.4, 4.8)           | -2.8 (-6.9, 1.3)            |
| <b>Concurrent policies (control variables):</b> |                               |                             |                             |
| With Contracting                                | <b>193.1 (76.7, 309.6)</b>    | 25.5 (-2.3, 53.5)           | -14.8 (-40.5, 10.8)         |
| With Voucher                                    | -43.1 (-92.6, 6.4)            | <b>15.7 (5.9, 25.5)</b>     | <b>12.2 (8.1, 16.3)</b>     |
| With Subo                                       | -8.1 (-100.5, 84.3)           | <b>41.2 (21.9, 60.3)</b>    | -                           |
| With Gabi                                       | -92.1 (-169.9, 14.2)          | <b>27.7 (11.3, 44.1)</b>    | 0.5 (-9.3, 10.2)            |
| With MWI                                        | <b>-55.2 (-101.4, -9.0)</b>   | <b>-44.1 (-53.5, -34.6)</b> | 3.8 (-0.8, 8.4)             |

Note: This analysis excludes data from three large hospitals in Phnom Penh, Battambang, and Banteay Meanchey
